# Supplementary material for: Telomere length heterogeneity in placenta revealed with high-resolution telomere length analysis
Source: PubMed Central journal article supplement (PMC5687939; doi:10.1016/j.placenta.2017.09.007), 2017-11

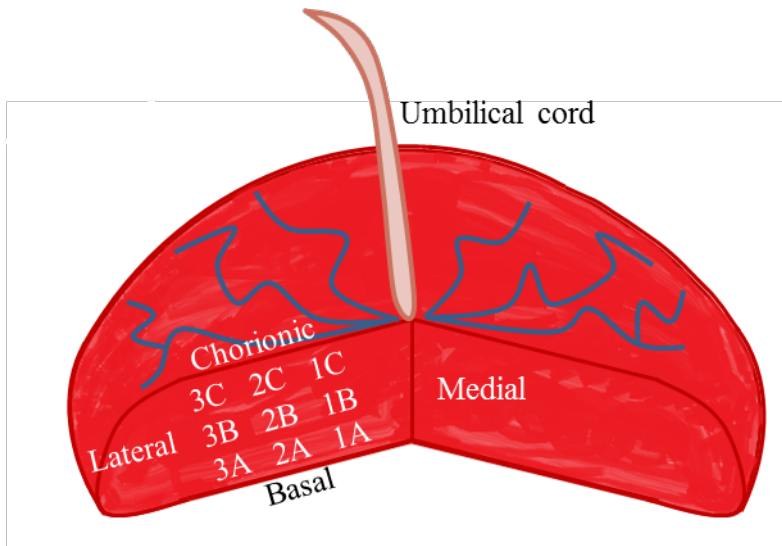

Supplement: mmc1.pdf [file mmc1.pdf]
